# Supplementary material for: Non-Invasive O-Toluidine Monitoring during Regional Anaesthesia with Prilocaine and Detection of Accidental Intravenous Injection in an Animal Model
Source: MDPI journal article supplement (doi:10.3390/metabo12060502), 2022-05-31
Supplement: s1 [file s1]

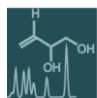

Supplement Figures S1 and S2 and Table S1:

**Pigs Group A (Intravenous injection of prilocaine during regional anaesthesia)**

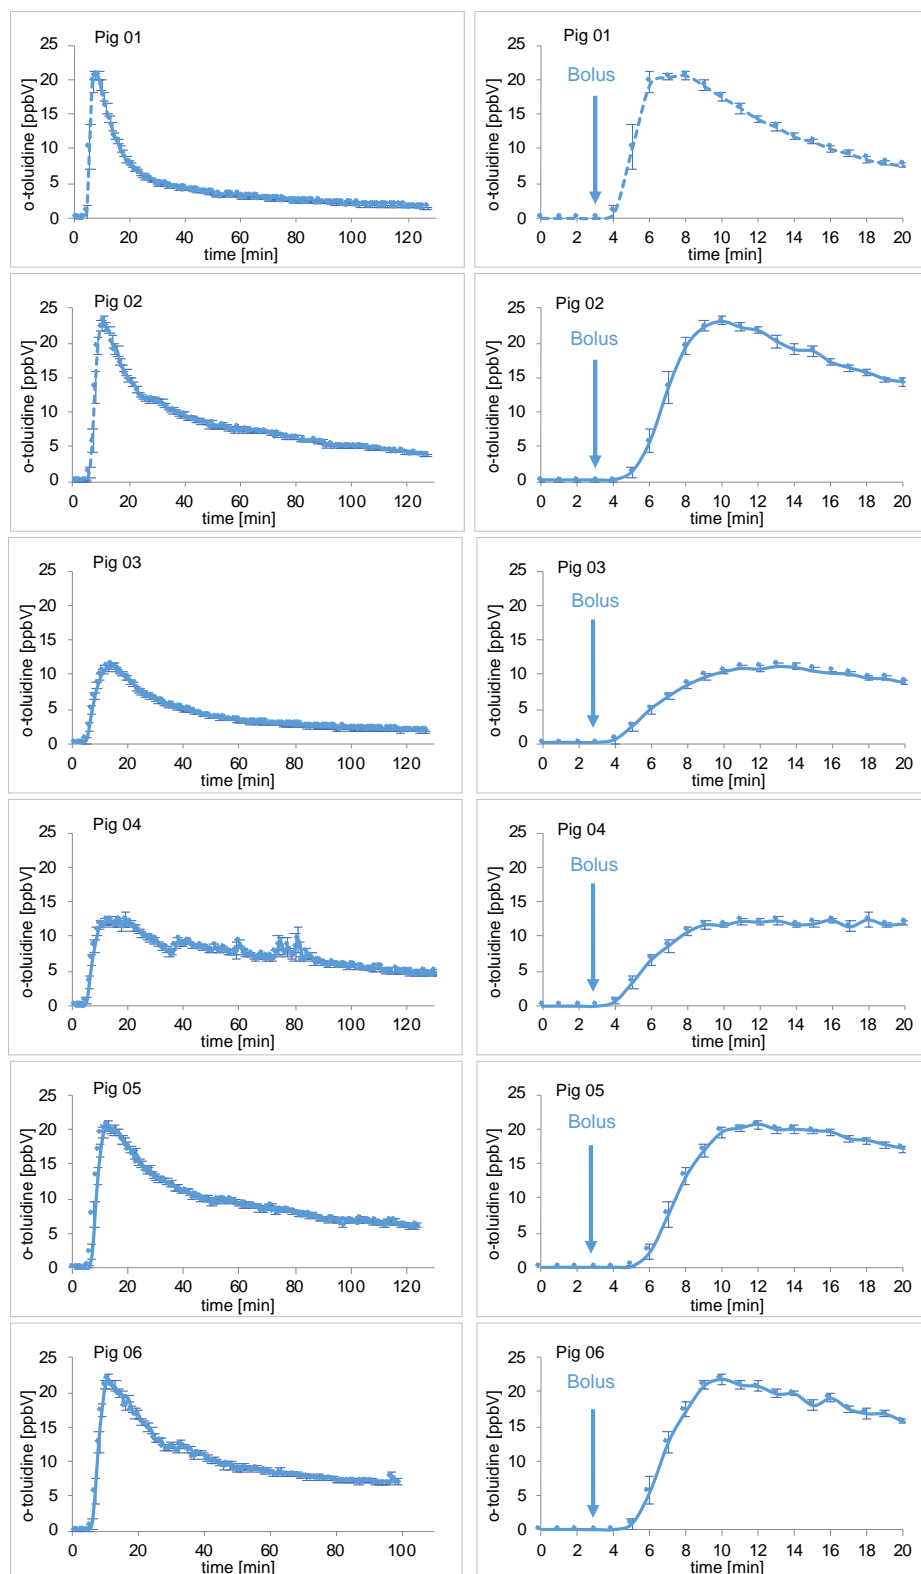

**Figure S1.** Continuous measurement of o-toluidine concentrations in breath by PTR-ToF-MS over 120 min for six single pigs from Group A (intravenous injection of prilocaine, blue line, diagrams on the left side). Each data point represents mean concentrations over one minute. The diagrams on

the right side show o-toluidine breath concentrations during the first 20 min. Bolus was administered at 3<sup>rd</sup> minute.

### Pigs Group B (Cervical plexus regional anaesthesia using prilocaine)

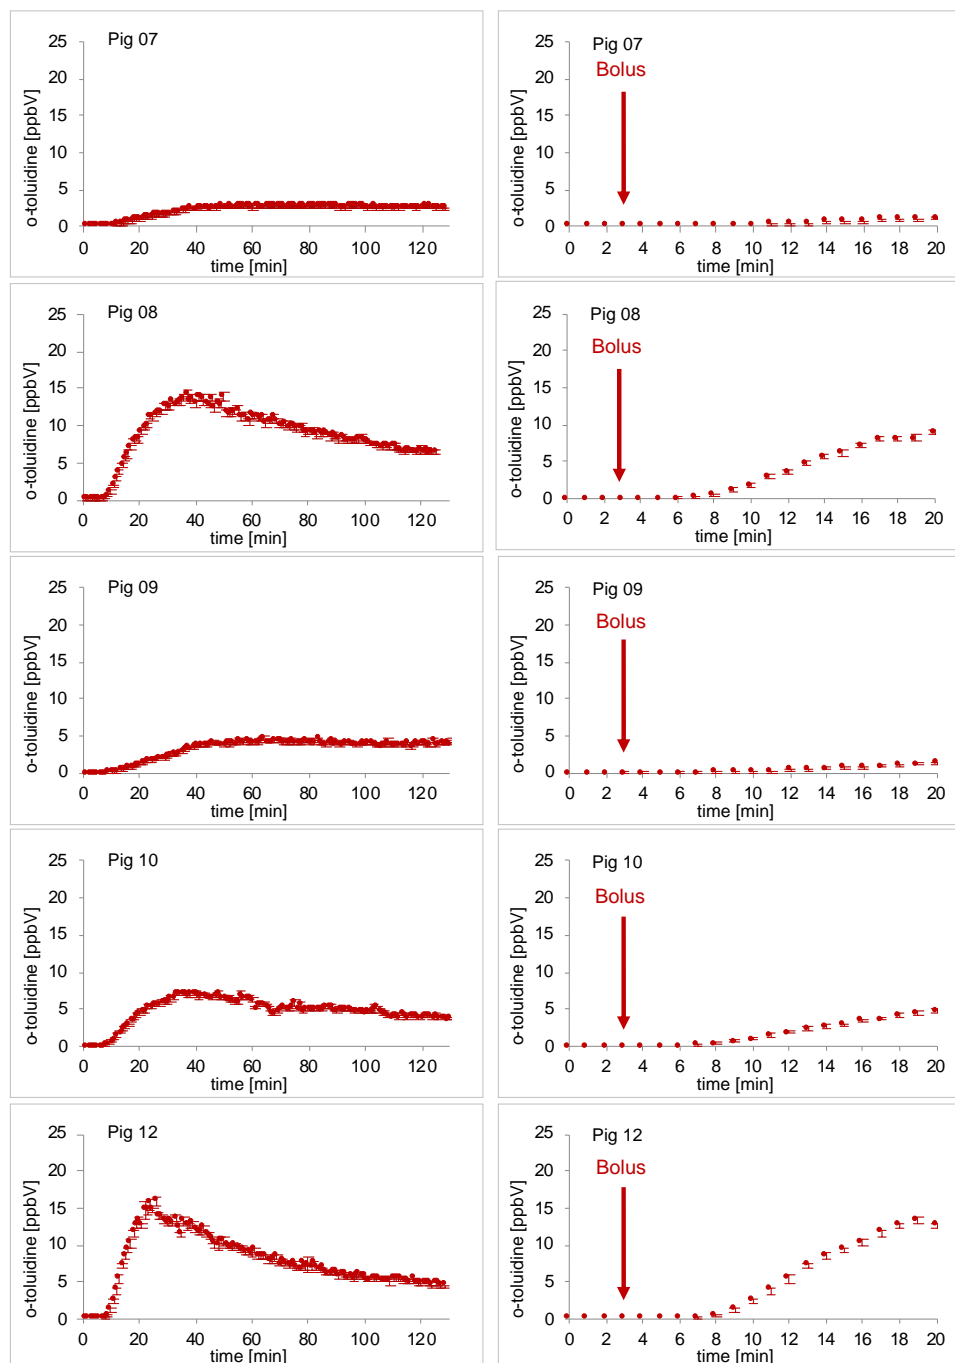

**Figure S2.** Continuous measurement of o-toluidine concentrations in breath by PTR-ToF-MS over 120 min for five single pigs from Group B (cervical plexus regional anaesthesia with prilocaine, red line, diagrams on the left side). Each data point represents mean concentrations over one minute. The diagrams on the right side show o-toluidine breath concentrations during the first 20 min. Bolus was administered at 3<sup>rd</sup> minute.

**Table S1.** Pearson product correlation coefficients between blood and breath parameters (P1-P6). Statistically significant correlations ( $p < 0.05$ ) are marked in bold.

|              |                      |   | o-toluidine in blood | o-toluidine in breath |
|--------------|----------------------|---|----------------------|-----------------------|
| Both groups  | prilocaine in blood  | r | 0.68                 | 0.033                 |
|              |                      | p | <0.001               | 0.80                  |
|              | o-toluidine in blood | r |                      | 0.316                 |
|              |                      | p |                      | 0.011                 |
| Only group A | prilocaine in blood  | r | 0.66                 | -0.167                |
|              |                      | p | <0.001               | 0.34                  |
|              | o-toluidine in blood | r |                      | 0.015                 |
|              |                      | p |                      | 0.93                  |
| Only group B | prilocaine in blood  | r | 0.47                 | 0.08                  |
|              |                      | p | 0.008                | 0.66                  |
|              | o-toluidine in blood | r |                      | 0.85                  |
|              |                      | p |                      | <0.001                |
